# Supplementary material for: Solid phase synthesis of a thrombin binding aptamer on macroporous silica for label free optical quantification of thrombin
Source: Royal Society of Chemistry journal article supplement (doi:10.1039/c6ra18401d), 2016-01-01
Supplement: c6ra18401d1.pdf [file c6ra18401d1.pdf]

# Supporting information

## **SOLID PHASE SYNTHESIS OF THROMBIN BINDING APTAMER ON MACROPOROUS SILICA FOR LABEL FREE OPTICAL QUANTIFICATION OF THROMBIN**

Monica Terracciano<sup>1</sup>, Luca De Stefano<sup>1</sup>, Nicola Borbone<sup>2</sup>, Jane Politi<sup>1</sup>, Giorgia Oliviero<sup>2</sup>,  
Fabrizia Nici,<sup>2</sup> Maurizio Casalino<sup>1</sup>, Gennaro Piccialli,<sup>2</sup> Principia Dardano<sup>1</sup>, Michela Varra<sup>2</sup> and  
Ilaria Rea<sup>1</sup>

<sup>1</sup>Institute for Microelectronics and Microsystems, National Council of Research, Naples, Italy

<sup>2</sup>Department of Pharmacy, University of Naples Federico II, Naples, Italy

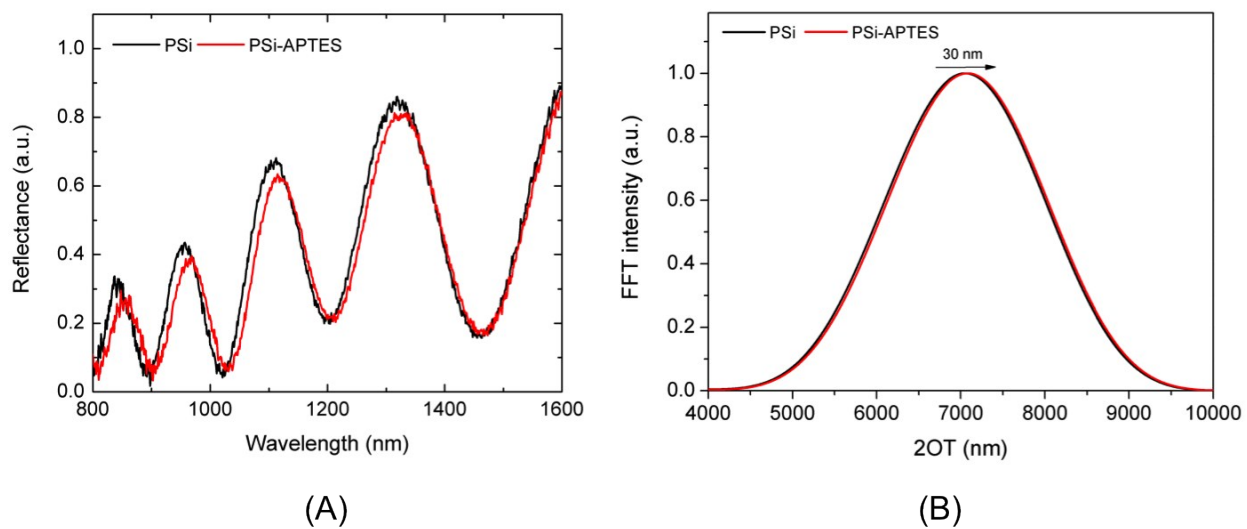

**Figure S1.** Reflectivity spectra (A) and corresponding FFTs (B) of porous silica structure before (black line) and after (red line) APTES functionalization.

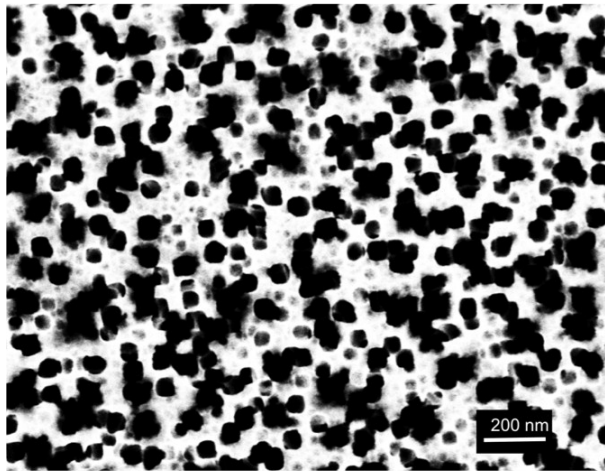

(A)

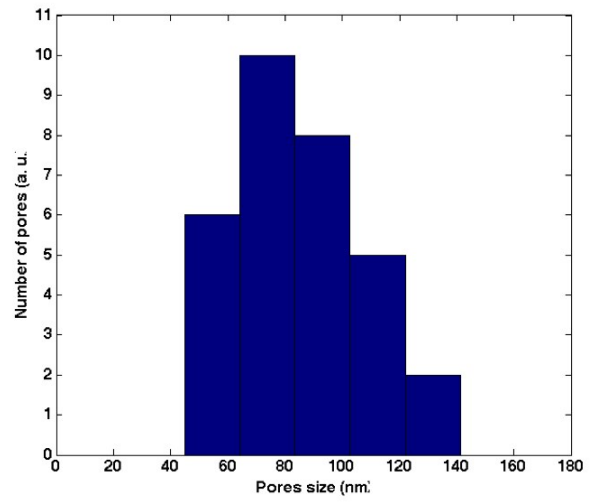

(B)

**Figure S2.** SEM of oxidized macroporous silicon (A) and corresponding histogram of pores size distribution (B).

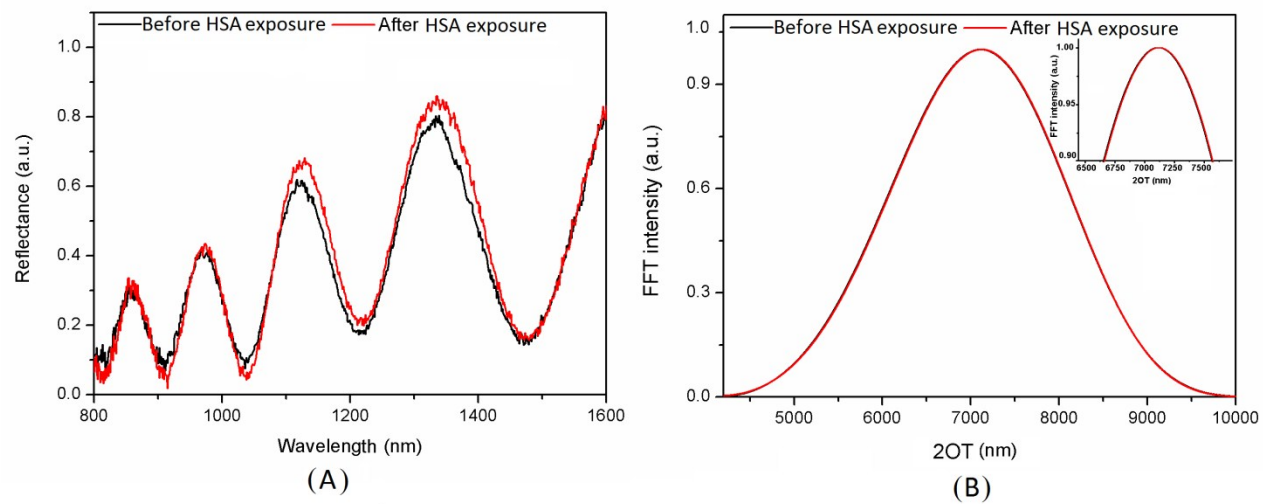

**Figure S3.** Reflectivity spectra (A) and corresponding Fourier transforms (B) of PSi-aptasensor after exposure to the control HSA solution (109 nM).
